# Supplementary material for: Detection of endogenous translesion DNA synthesis in single mammalian cells
Source: PubMed Central journal article supplement — Cell Rep Methods. 2023 Jun 14;3(6):100501. doi: 10.1016/j.crmeth.2023.100501 (PMC10326377; doi:10.1016/j.crmeth.2023.100501), 2023-06-14
Supplement: mmc1.pdf [file mmc1.pdf]

**Cell Reports Methods, Volume 3**

**Supplemental information**

**Detection of endogenous translesion DNA  
synthesis in single mammalian cells**

**Tom Egger, Antoine Aze, and Domenico Maiorano**

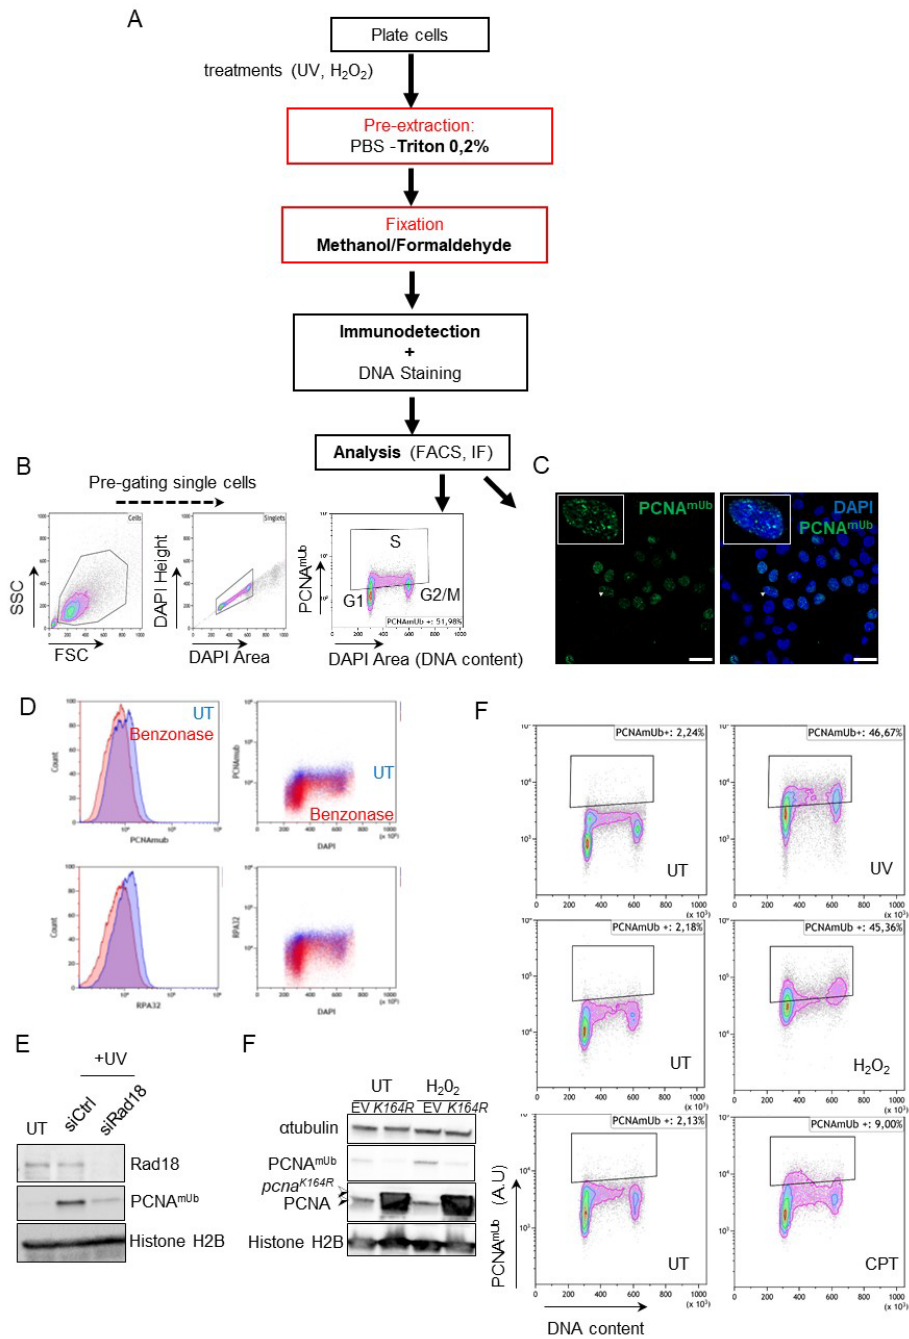

**Figure S1: Detection of endogenous TLS components by flow cytometry and immunofluorescence. Related to Figure 1 and 3. A**, Workflow for the detection of TLS components by flow cytometry (FACS) or immunofluorescence (IF) with or without treating cells with UV or hydrogen peroxide (H<sub>2</sub>O<sub>2</sub>). **B**, FSC/SSC graph was used to gate out cellular debris. DAPI area over DAPI height graph was used to gate out doublets. 20,000 events were retained. G1, S and G2 cell cycle phases were displayed on graph based on the DNA content of cells. PCNA<sup>mUb</sup> fluorescence is plotted against the DAPI fluorescence in HCT116 cells. **C**, Immunodetection of PCNA<sup>mUb</sup> in untreated HCT116 cells. DAPI was used to detect nuclei. Scale bar: 20 μm. **D**, Quantification of PCNA<sup>mUb</sup> (upper panel) and RPA2 (lower panel) detected by flow cytometry in HCT116 cells treated with benzonase. UT, untreated. **E**, left panel, Western blot of H1299 cells untreated (UT), or treated with 20 J/m<sup>2</sup> of UV-C light (UV), upon transient Rad18 downregulation by siRNA or treated with control siRNA (siCtrl). Right panel, Western blot of HEK293T whole cell extracts transfected with either empty vector (EV) or a vector expressing the *pcna*<sup>K164R</sup> mutant, untreated (UT), or treated with hydrogen peroxide (H<sub>2</sub>O<sub>2</sub>). n=2. **F**, Quantification of PCNA<sup>mUb</sup> detected by flow cytometry in HCT116 cells exposed to 20 J/m<sup>2</sup> of UV-C radiation, 1 mM hydrogen peroxide (H<sub>2</sub>O<sub>2</sub>), or camptothecin (CPT) described in Fig. 1. UV: n=3; H<sub>2</sub>O<sub>2</sub>: n=3; CPT: n=2.

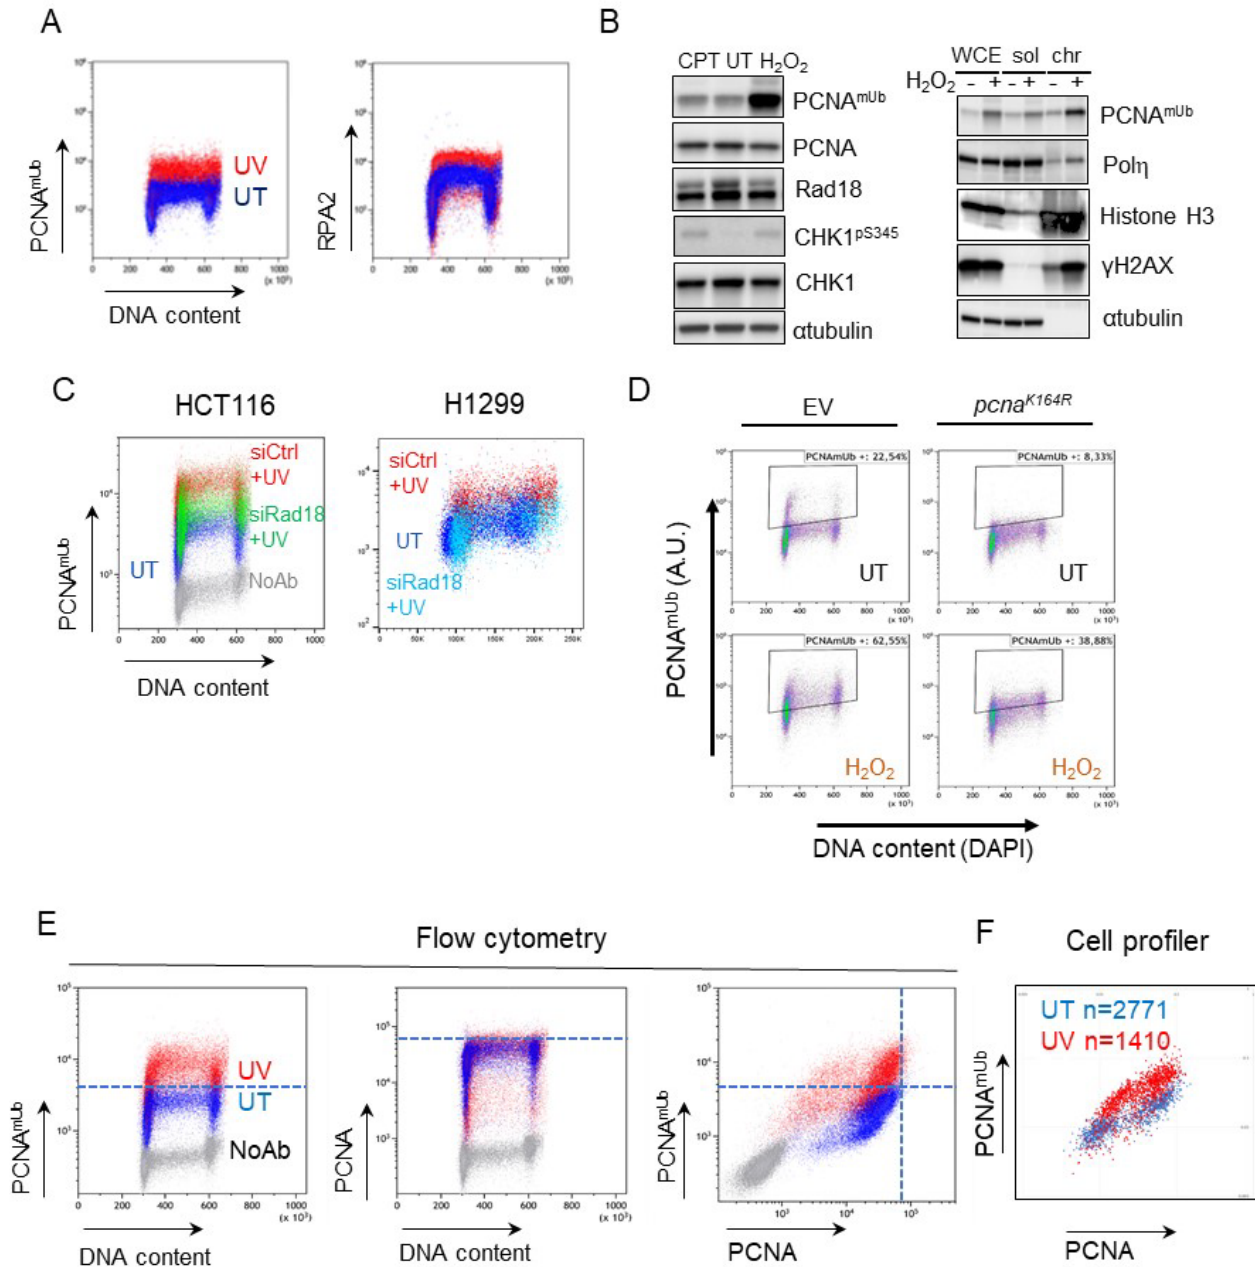

**Figure S2: Related to Figure 3. Detection of chromatin-bound PCNA<sup>mUb</sup> by flow cytometry upon exposure to DNA damaging agents.** **A**, Flow cytometry analysis of either PCNA<sup>mUb</sup> (left panel) or RPA fluorescence (right panel) in the same HCT116 cells untreated (UT, blue), treated with 20 J/m<sup>2</sup> of UV-C light (UV, red), n=3. **B**, Left panel, Western blot of HCT116 whole cell extracts untreated (UT), treated with camptothecin (CPT) or hydrogen peroxide (H<sub>2</sub>O<sub>2</sub>). Right panel, western blot of HCT116 whole cell extract (WCE), soluble (sol) and chromatin fractions (chr) obtained in the absence (-) or presence (+) of H<sub>2</sub>O<sub>2</sub>. A-B, n= 2. **C**, Flow cytometry analysis of PCNA<sup>mUb</sup> fluorescence in the indicated cell lines untreated (UT, blue), or treated with 20 J/m<sup>2</sup> of UV-C light (UV, red), upon transient Rad18 downregulation by siRNA or treated with control siRNA, n=2. **D**, Flow cytometry analysis of HEK293T cells transfected with either empty vector (EV) or a vector expressing the *pcna*<sup>K164R</sup> mutant, untreated or treated as indicated. **E-F**, Co-detection of PCNA and PCNA<sup>mUb</sup> in HCT116 cells untreated (UT, blue) or exposed to 20 J/m<sup>2</sup> of UV-C (UV, red) by either flow cytometry (E) or IF (F), quantification obtained with the Cell Profiler software. Note that in both case, PCNA<sup>mUb</sup> and not total PCNA level increases upon exposure to UV-C light, n=3.

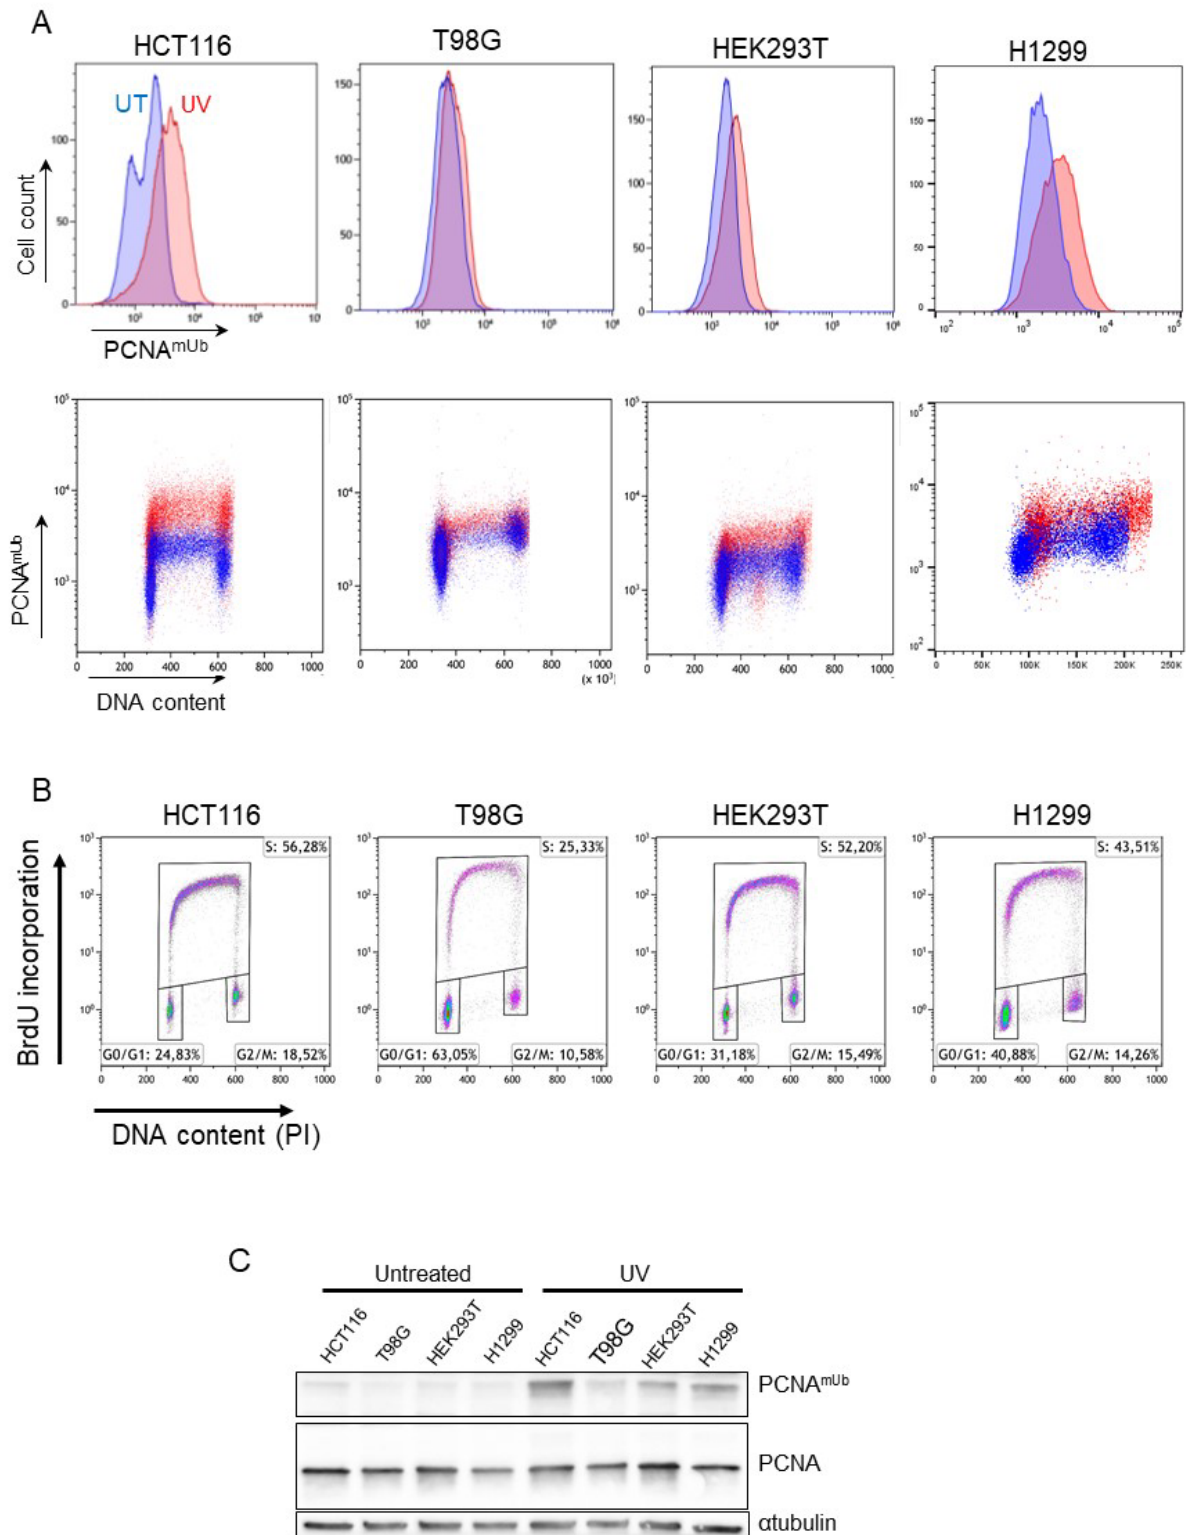

**Figure S3: Related to Figure 1. Chromatin-bound PCNA<sup>mUb</sup> detection by flow cytometry in different cell lines. A,** The indicated cell lines were either untreated (UT) or exposed to 20 J/m<sup>2</sup> of UV-C light. PCNA<sup>mUb</sup> fluorescence was detected by flow cytometry and displayed as presented in Fig 1a. **B,** Cell cycle analysis of the indicated cell lines. The data show a correlation between the level of PCNA<sup>mUb</sup> and the percentage of cells in S-phase. HCT116: n=3, U87: n=2, HEK293: n=2. **C,** Western blot of whole cell extracts obtained from the indicated cell lines untreated or exposed to 20 J/m<sup>2</sup> of UV-C radiation. n=3.

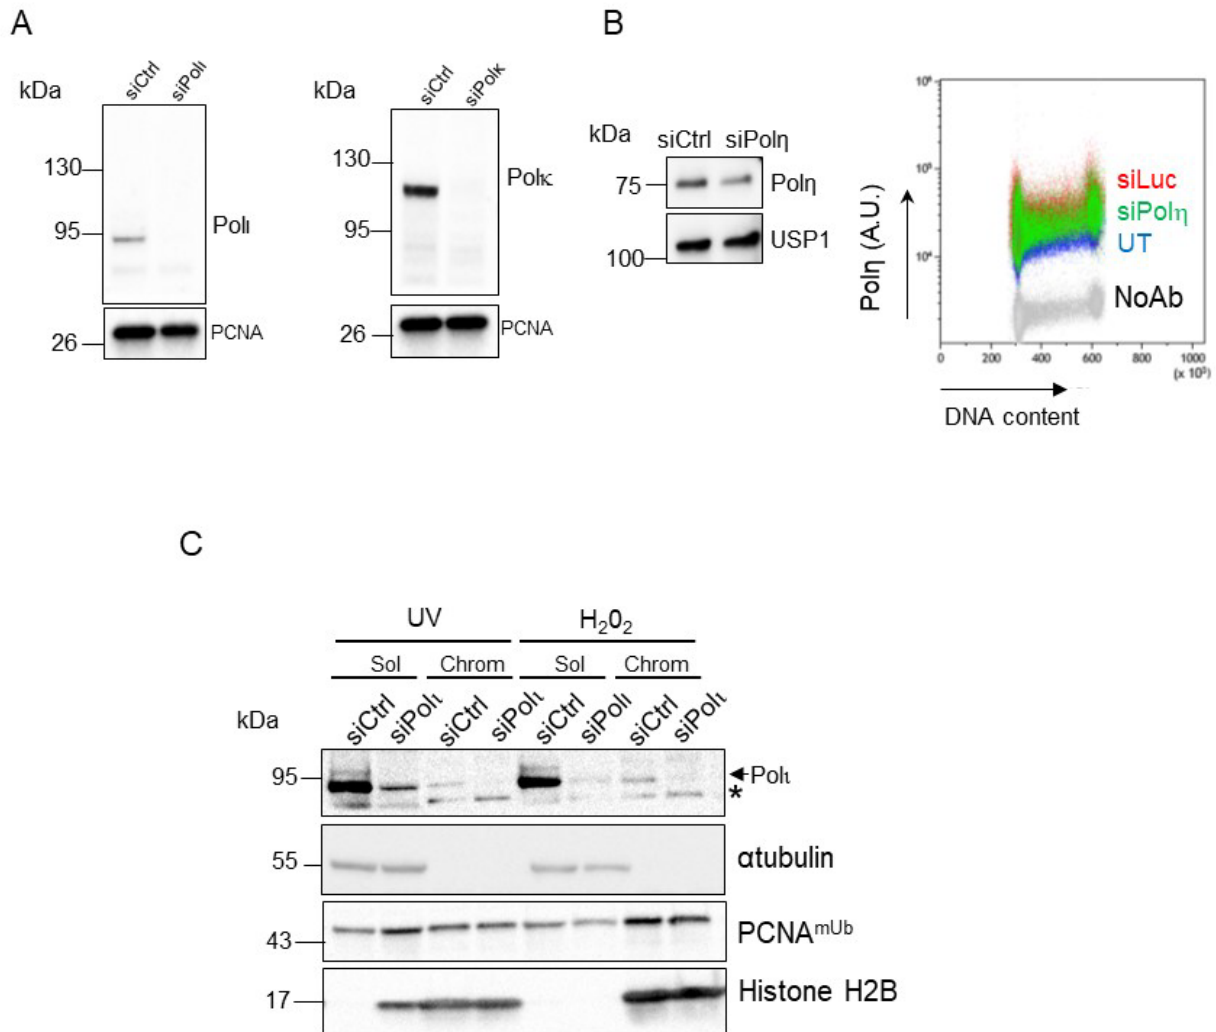

**Figure S4: Related to Figure 2. Specificity of Pol $\eta$  and Pol $\kappa$  antibodies.** **A**, Western blot of whole cell extracts obtained from HCT116 cells treated with either control siRNA (Ctrl) or the indicated target-specific siRNA untreated (UT). **B**, left panel, Western blot of chromatin fractions isolated from HCT116 cells treated with either control (siLuc), or Pol $\eta$ -specific siRNA. USP1 is used here as total proteins loading control. Right panel, Detection of Pol $\eta$  by flow cytometry in cells treated with the siRNA described in (A), untreated (blue) or exposed to 1 mM H<sub>2</sub>O<sub>2</sub> in presence of siLuc (red) or siPol $\eta$  (green). A sample devoid of primary antibody (No Ab) was included as a control, n=3. **C**, Western blot of HCT116 soluble (sol) and chromatin fractions (chr) obtained upon treatment with either control siRNA (Ctrl) or an siRNA targeting Pol $\eta$ , and exposure to either 20 J/m<sup>2</sup> of UV-C (UV) or 1 mM hydrogen peroxide (H<sub>2</sub>O<sub>2</sub>). \*indicates a non-specific polypeptide recognized by the Pol $\eta$  antibody. n=2.

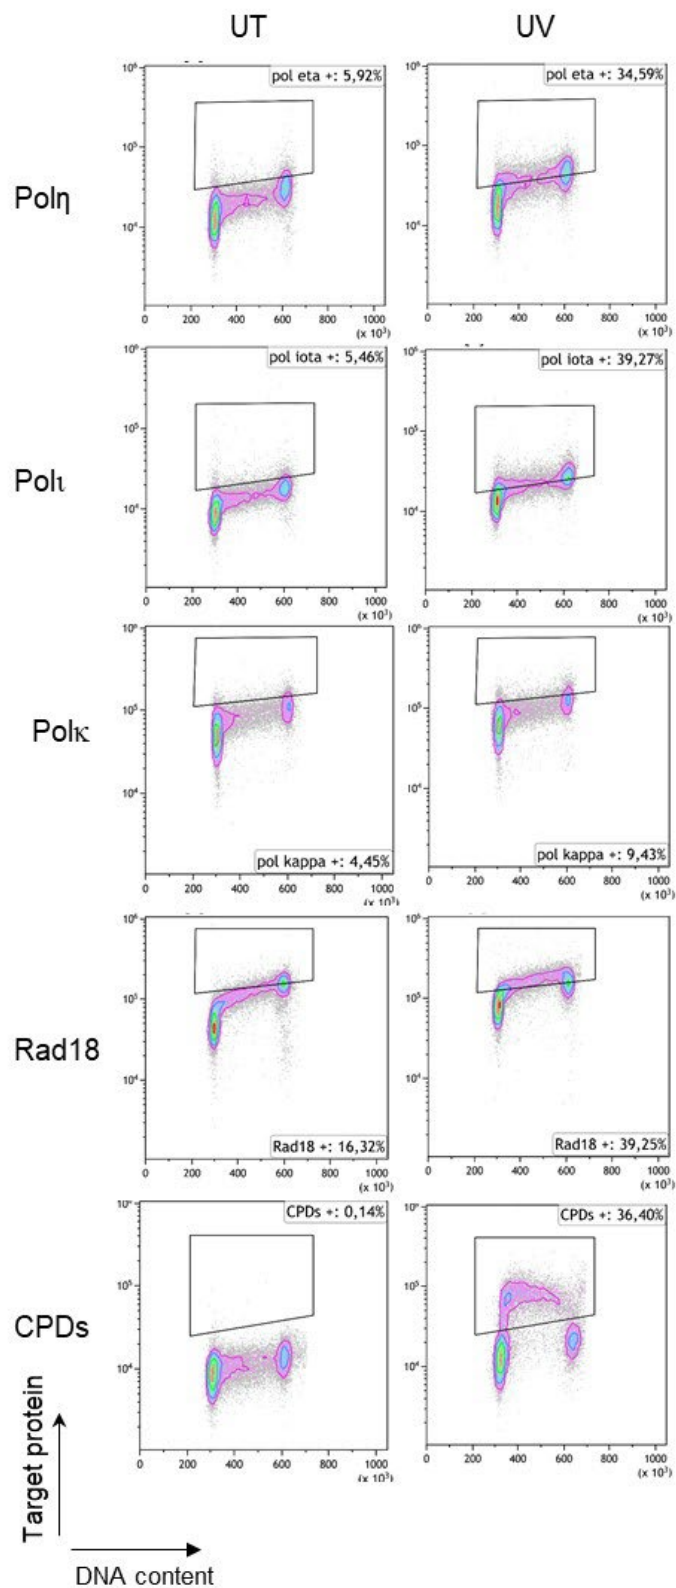

**Figure S5: Related to Figure 2. Quantification of TLS components by flow cytometry upon treatment with different DNA damaging agents.** Quantification of the indicated TLS targets by flow cytometry in HCT116 cells untreated (UT) or exposed to 20 J/m<sup>2</sup> UV-C radiation, n=3.

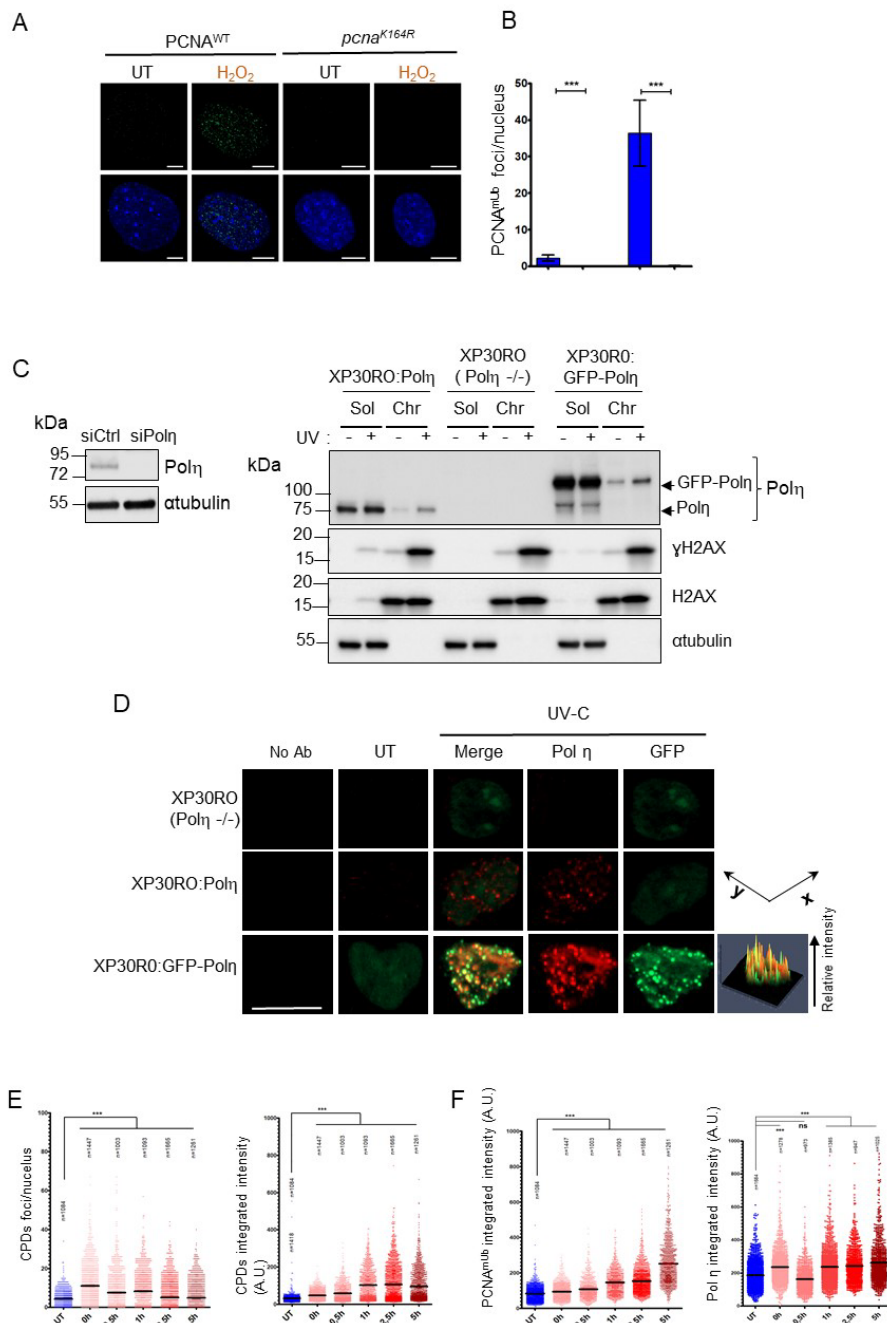

**Figure S6: Related to Figure 4 and 5. Pol $\eta$  detection by either flow cytometry and immunofluorescence in cells with reduced Pol $\eta$  abundance. **A**, Immunofluorescence staining of mouse embryonic fibroblasts (MEFs) either wild-type (WT) or carrying the *pcna*<sup>K164R</sup> mutation<sup>1</sup>, treated as in Fig. S1E. Scale bar: 10  $\mu$ m. **B**, Quantification of PCNA<sup>mUb</sup> foci/nucleus of left panel. Data are means  $\pm$  SEM. Mann Whitney test, \* $p$ <0.05, \*\* $p$ <0.01, \*\*\* $p$ <0.001. **C-D**, Detection of Pol $\eta$  by either western blot (C) or immunofluorescence (D) in HCT116 cells treated with the indicated siRNA (C, left panel) or in XPRO30 fibroblasts (right panel) bearing a homozygous mutation in the Pol $\eta$  gene (*pol $\eta$ <sup>-/-</sup>*), complemented with either wild-type Pol $\eta$  (XPRO30:Pol $\eta$ ) or with GFP-tagged Pol $\eta$  (XPRO30:GFP-Pol $\eta$ ). Cells were either untreated (UT) or exposed to 20 J/m<sup>2</sup> of UV-C light. A representative cell is shown. A 3D visualization of the relative intensity of the both GFP and Pol $\eta$  labeling is shown (same cell),  $n=2$ . **E**, Cell Profiler quantification of either CPDs foci/nucleus (left panel) or CPDs nuclear intensity (left panel) observed during the time course of UV-C irradiation. A.U.: arbitrary units. Stars indicate significant differences, \*\*\*  $P$  <0.001 (non-parametric Mann Whitney test). **F**, Cell Profiler quantification of either PCNA<sup>mUb</sup> nuclear integrated intensity (left panel) or Pol $\eta$  nuclear integrated intensity (right panel) observed during the time course of UV-C irradiation. A.U.:**

arbitrary units. Stars indicate significant differences, \*\*\* P <0.001 (non-parametric Mann Whitney test).

### **Supplementary References**

1. Langerak, P., Nygren, A.O.H., Krijger, P.H.L., van den Berk, P.C.M., and Jacobs, H. (2007). A/T mutagenesis in hypermutated immunoglobulin genes strongly depends on PCNAK164 modification. *J. Exp. Med.* 204, 1989–1998. 10.1084/jem.20070902.
